# Supplementary material for: ATG9A regulates the dissociation of recycling endosomes from microtubules to form liquid influenza A virus inclusions
Source: PLoS Biol. 2023 Nov 20;21(11):e3002290. doi: 10.1371/journal.pbio.3002290 (PMC10695400; doi:10.1371/journal.pbio.3002290)
Supplement: S1 Data — The different information is separated by different sheets at the bottom of the excel file. (XLSX) [file pbio.3002290.s009.xlsx]

## Sheet: Fig 1B, 1C
																				% Recycled Transferrin
GFP-Rab11a WT low (normalized to 15 min)
																				15 min (normalized to WT Mock)
SINGLETS	Mock#1			Mock#2			Mock#3			PR8#1			PR8#2			PR8#3				Experimental condition	Exp 1	Exp 2	Exp 3	Exp 4
0	0			0			0			0			0			0				WT Mock	100	100	100	100
5	62.3986	64.2078	63.8534	58.7148	56.2248	60.3244	57.6698	61.2998	56.0656	12.415	14.7411	16.0484	1.79254	4.43679	6.59577	10.2002	12.6396	15.0251		WT PR8	39.95	42.79	45.30	62.68
10	87.9884	89.9468	90.1427	85.6514	88.9713	89.1474	84.4731	88.0328	85.9251	36.5417	33.0525	37.0646	30.1761	33.7018	18.5296	32.6731	36.3646	30.9569		DN Mock	83.71	93.78	84.89	86.2
15	100	99.9347	99.1514	96.831	100	95.5734	99.4496	100	100	48.7222	47.8116	50.0566	34.395	42.7041	40.7729	41.8371	46.4353	45.8308		DN PR8	17.73	25.87	25.29	39.50
Average	Mock#1	Mock#2	Mock#3	PR8#1	PR8#2	PR8#3		Difference#1	Difference#2	Difference#3		Mean_Difference
5	63.4866	58.4214	58.345	14.4015	4.27503	12.6216		49.0851	54.1463	45.7234		49.6516									WT Mock	WT PR8	DN Mock	DN PR8
10	89.3593	87.9234	86.1436	35.5529	27.4692	33.3315		53.8064	60.4542	52.8121		55.6909								Number of values	4	4	4	4
15	99.6954	97.4681	99.8165	48.8635	39.2907	44.7011		50.8319	58.1774	55.1155		54.7083
																				Minimum	100	39.95	83.71	17.73
POSITIVES	Mock#1			Mock#2			Mock#3			PR8#1			PR8#2			PR8#3				25% Percentile	100	40.66	84.01	19.62
0	0			0			0			0			0			0				Median	100	44.05	85.55	25.58
5	62.6291	64.4339	63.9036	58.8035	56.3098	60.4156	57.6698	61.2998	56.0656	12.4219	14.7493	15.7326	2.19338	4.35763	6.48307	10.5256	12.9382	14.9131		75% Percentile	100	58.34	91.88	36.09
10	88.0547	90.0084	90.3061	85.7809	89.1058	89.1058	84.4731	88.0328	85.7494	36.5621	32.8003	37.0853	29.6591	33.4635	18.5952	32.7511	36.0711	31.0538		Maximum	100	62.68	93.78	39.5
15	100	99.9349	99.1534	96.8262	100	95.7179	99.4496	99.8595	100	48.7494	47.8383	50.0845	34.1429	41.6547	40.0728	41.5047	46.063	45.4652
																				Mean	100	47.68	87.15	27.1
Average	Mock#1	Mock#2	Mock#3	PR8#1	PR8#2	PR8#3		Difference#1	Difference#2	Difference#3		Mean_Difference								Std. Deviation	0	10.24	4.539	9.062
5	63.6555	58.5097	58.345	14.3013	4.34469	12.7923		49.3543	54.165	45.5527		49.6907								Std. Error of Mean	0	5.118	2.269	4.531
10	89.4564	87.9975	86.0851	35.4826	27.2393	33.292		53.9738	60.7582	52.7931		55.8417
15	99.6961	97.5147	99.7697	48.8908	38.6235	44.3443		50.8053	58.8912	55.4254		55.0407								Lower 95% CI of mean	100	31.39	79.92	12.68
																				Upper 95% CI of mean	100	63.97	94.37	41.52
																				Sum	400	190.7	348.6	108.4
GFP-Rab11a DN low (normalized to 15 min)
SINGLETS	Mock#1			Mock#2			Mock#3			PR8#1			PR8#2			PR8#3
0	0			0			0			0			0			0
5	66.499	72.3988	74.0681	49.0825	48.5302	49.0825	45.186	40.7613	38.2771	-14.4798	-8.56475	-25.614	-23.4097	-10.7102	-17.3722	-12.1972	-14.4957	-7.66156
10	86.3023	85.1132	86.005	77.8372	78.3182	66.8626	77.8149	67.5318	83.2901	-2.24825	-9.12681	-12.0977	-9.99307	0	5.5517	3.7082	1.07262	7.86076
15	95.5866	90.9216	100	94.8512	100	93.0875	94.7967	95.7731	100	9.76917	4.4162	3.31884	17.5804	20.1712	16.2619	10.4044	17.3151	15.8594
Average	Mock#1	Mock#2	Mock#3	PR8#1	PR8#2	PR8#3		Difference#1	Difference#2	Difference#3		Mean_Difference
5	70.9886	48.8984	41.4081	-16.2195	-17.164	-11.4515		87.2081	66.0624	52.8596		68.7101
10	85.8068	74.3393	76.2123	-7.82426	-1.48046	4.21386		93.6311	75.8198	71.9984		80.4831
15	95.5027	95.9796	96.8566	5.83474	18.0045	14.5263		89.668	77.9751	82.3303		83.3244
POSITIVES	Mock#1			Mock#2			Mock#3			PR8#1			PR8#2			PR8#3
0	0			0			0			0			0			0
5	60.9578	67.9383	69.9134	49.4428	48.8944	48.8944	45.186	40.3411	38.2771	-9.96653	-4.29544	-22.4317	-24.5298	-10.8735	-16.8598	-11	-13.0814	-7.41601
10	84.3885	82.6299	84.0368	77.994	78.4716	67.0971	77.5182	67.2105	83.0058	3.004	-4.29544	-7.43981	-10.1252	-0.70152	4.2325	3.34961	0.964908	7.08518
15	95.3734	89.5022	100	94.8877	100	93.1364	94.7967	95.5259	100	15.1604	10.0508	8.31012	17.1404	18.4733	16.4857	9.38718	15.6177	13.8671
Average	Mock#1	Mock#2	Mock#3	PR8#1	PR8#2	PR8#3		Difference#1	Difference#2	Difference#3		Mean_Difference
5	66.2698	49.0772	41.2681	-12.2312	-17.421	-10.4991		78.5011	66.4982	51.7672		65.5888
10	83.6851	74.5209	75.9115	-2.91041	-2.19807	3.7999		86.5955	76.719	72.1116		78.4754
15	94.9585	96.008	96.7742	11.1737	17.3665	12.9573		83.7848	78.6415	83.8169		82.0811

## Sheet: Fig 1E
PR8 12h
Time	01'20				01'32				01'36				01'46				02'00
		Fluorescence Intensity				Fluorescence Intensity				Fluorescence Intensity				Fluorescence Intensity				Fluorescence Intensity
	Distance (um)	ER tubule	Inclusion		Distance (um)	ER tubule	Inclusion		Distance (um)	ER tubule	Inclusion		Distance (um)	ER tubule	Inclusion		Distance (um)	ER tubule	Inclusion
	0	10778	10104		0	10620	10823		0	10446	10676		0	10879	10549		0	11177	10191
	0.05412	10767.7	10097		0.05412	10725.5	11057.5		0.05412	10487.4	11027.8		0.05412	10899.3	10718		0.05412	11109.8	10165.2
	0.10823	10728.6	10090.9		0.10823	10794.9	11183.8		0.10823	10522.6	11330.5		0.10823	10889.2	10925		0.10823	11069	10148
	0.16235	10664.5	10129.5		0.16235	10785.1	11230.8		0.16235	10577.2	11567.9		0.16235	10860.5	11144.3		0.16235	10971	10125.8
	0.21646	10601.1	10212		0.21646	10709.4	11319.5		0.21646	10603.7	11738		0.21646	10812.7	11307.8		0.21646	10843.5	10104.5
	0.27058	10560.7	10313		0.27058	10591.7	11480		0.27058	10578.9	11912.7		0.27058	10729.5	11376.1		0.27058	10751.8	10112
	0.32469	10545.2	10446.4		0.32469	10480	11651		0.32469	10511.5	12146.9		0.32469	10592.7	11381.2		0.32469	10724	10185
	0.37881	10536.3	10671.5		0.37881	10409.7	11832.2		0.37881	10439.6	12403.8		0.37881	10421.9	11394.9		0.37881	10716.3	10346.3
	0.43292	10510.9	11024.3		0.43292	10387.7	12004.3		0.43292	10394.8	12580.8		0.43292	10311.7	11513		0.43292	10653.5	10559.2
	0.48704	10480.2	11384.3		0.48704	10402.2	12126.6		0.48704	10350	12661.5		0.48704	10275.8	11679.8		0.48704	10542.6	10756.2
	0.54115	10470.4	11571.8		0.54115	10431.6	12174.6		0.54115	10319.6	12607.6		0.54115	10315.8	11896		0.54115	10462.6	10899
	0.59527	10481.2	11645.6		0.59527	10462.8	12167.4		0.59527	10305.9	12501.3		0.59527	10342.6	12041.8		0.59527	10462.5	11019.6
	0.64939	10488.2	11778		0.64939	10490.8	12122.5		0.64939	10311.8	12352.6		0.64939	10333.6	12080.6		0.64939	10482.5	11165.9
	0.7035	10479.5	12044.5		0.7035	10507	12029.8		0.7035	10330.1	12170.6		0.7035	10306.5	12069.4		0.7035	10452.5	11334.6
	0.75762	10462.6	12359.1		0.75762	10502.4	11865.9		0.75762	10361.2	11975.3		0.75762	10285.4	12023.7		0.75762	10377.7	11511.5
	0.81173	10447.8	12567		0.81173	10476.2	11618		0.81173	10410.4	11817.4		0.81173	10293.2	11957.1		0.81173	10327.7	11648.9
	0.86585	10458	12635.3		0.86585	10453.5	11350.3		0.86585	10481.6	11709.4		0.86585	10328.3	11885.5		0.86585	10342.5	11719.7
	0.91996	10420.2	12539.6		0.91996	10441.9	11076.1		0.91996	10545.5	11519		0.91996	10394.1	11765.4		0.91996	10418.2	11696.4
	0.97408	10333.3	12444.2		0.97408	10416	10820.5		0.97408	10580.5	11211.1		0.97408	10457	11633.9		0.97408	10492.1	11672.9
	1.02819	10218.8	12377.7		1.02819	10368.9	10637.4		1.02819	10557.6	10807.4		1.02819	10485.2	11532.5		1.02819	10534.6	11694.2
	1.08231	10131.8	12347.4		1.08231	10299.8	10530		1.08231	10520.6	10467.4		1.08231	10490.8	11485		1.08231	10569.8	11769
	1.13642	10137.8	12281.7		1.13642	10239.8	10506.3		1.13642	10542.1	10293.3		1.13642	10486.3	11472.9		1.13642	10645.3	11857.5
	1.19054	10194.8	12215		1.19054	10237.6	10540.4		1.19054	10617.4	10228		1.19054	10495.7	11443.3		1.19054	10723.5	11944
	1.24466	10240.2	12177.1		1.24466	10338.1	10588.2		1.24466	10711.5	10194.9		1.24466	10509.5	11361.2		1.24466	10764.4	12046.1
	1.29877	10246.9	12203		1.29877	10575.6	10628		1.29877	10776.7	10158.4		1.29877	10503.5	11201.8		1.29877	10747.3	12066.6
	1.35289	10230	12249.5		1.35289	10866.5	10644		1.35289	10842.5	10130		1.35289	10516.5	11025		1.35289	10675	12030.5
	1.407	10192.6	12307		1.407	11150.8	10660.5		1.407	10906.3	10133.9		1.407	10620	10892.7		1.407	10573.7	11895.4
	1.46112	10172.9	12278.2		1.46112	11320.3	10714.1		1.46112	10949.8	10201.6		1.46112	10800.9	10853		1.46112	10428.5	11764.8
	1.51523	10191.3	12070		1.51523	11355.5	10813.1		1.51523	10945.1	10355.6		1.51523	11001.5	10899		1.51523	10274	11705.6
	1.56935	10269.8	11749.5		1.56935	11226.3	10947		1.56935	10866.8	10598.5		1.56935	11068.8	10932.1		1.56935	10152.8	11713.7
	1.62346	10403	11391.8		1.62346	10965.4	11040.2		1.62346	10714.8	10868.6		1.62346	10926.4	10925.4		1.62346	10104.2	11770.2
	1.67758	10569.4	11101.7		1.67758	10660.5	11076		1.67758	10528.5	11032.6		1.67758	10630.9	10938.4		1.67758	10119.6	11834.3
	1.73169	10734.1	10907.7		1.73169	10414.6	11182.3		1.73169	10366.6	11075.1		1.73169	10353.3	10992.2		1.73169	10152.3	11862.8
	1.78581	10819.1	10774.2		1.78581	10267.6	11402.5		1.78581	10271.4	11055.5		1.78581	10200.4	11000		1.78581	10180.3	11743.8
	1.83992	10830.2	10682.4		1.83992	10223.8	11621.3		1.83992	10219	11046.6		1.83992	10165.9	10942.5		1.83992	10197.5	11534.5
	1.89404	10736.8	10554.2		1.89404	10209.9	11682		1.89404	10230.3	11095.4		1.89404	10203.8	10872.6		1.89404	10187.6	11352.9
	1.94816	10600.2	10408.5		1.94816	10195	11602		1.94816	10279.2	11120.1		1.94816	10273.6	10823.8		1.94816	10158	11293.3
	2.00227	10464.5	10278.4		2.00227	10166.1	11407.9		2.00227	10355.8	11051.9		2.00227	10338.5	10814.2		2.00227	10125.3	11355.7
	2.05639	10339.1	10177.3		2.05639	10144.5	11208.5		2.05639	10405.2	10893.2		2.05639	10397.4	10820.5		2.05639	10109.4	11452.7
	2.1105	10238.6	10113.5		2.1105	10148.6	11042.1		2.1105	10379	10724.1		2.1105	10461.4	10847.2		2.1105	10119.6	11546.9
	2.16462	10195.6	10098.4		2.16462	10160	10904.2		2.16462	10294.2	10609.4		2.16462	10525.2	10918.2		2.16462	10150.4	11647.4
	2.21873	10190.8	10113.1		2.21873	10143	10775.5		2.21873	10217.5	10510.9		2.21873	10553.4	11031.7		2.21873	10212.3	11713.8
	2.27285	10210.3	10126.3		2.27285	10101.4	10616.5		2.27285	10168.3	10414.7		2.27285	10544	11108.9		2.27285	10279.6	11658.4
	2.32696	10215.8	10121.3		2.32696	10058.7	10488.2		2.32696	10130.8	10328		2.32696	10512.4	11112.4		2.32696	10346	11498.8
	2.38108	10227.7	10107		2.38108	10052.9	10407.8		2.38108	10103.6	10276.9		2.38108	10470.8	10984.1		2.38108	10391.8	11222.2
	2.43519	10223.5	10096.6		2.43519	10067.8	10360.5		2.43519	10093.3	10236.3		2.43519	10409.9	10756		2.43519	10440.9	10919.3
	2.48931	10208.2	10090.3		2.48931	10086.8	10304		2.48931	10103.2	10196.1		2.48931	10335.1	10500.7		2.48931	10521.6	10659.4
	2.54343	10187.5	10088.8		2.54343	10086.1	10239.9		2.54343	10122.7	10164.2		2.54343	10272.7	10302.9		2.54343	10625.4	10490.3
	2.59754	10173.1	10098		2.59754	10072.7	10181		2.59754	10140.1	10145.4		2.59754	10238.1	10202.5		2.59754	10699.5	10394.1
	2.65166	10196	10120.2		2.65166	10071.6	10142.1		2.65166	10143.5	10133.5		2.65166	10236.6	10185.8		2.65166	10687.6	10344.8
	2.70577	10224	10145		2.70577	10092	10130		2.70577	10151	10125		2.70577	10241	10185		2.70577	10572	10290
Mock
Time	00'06				00'08				00'10				00'12				00'14
		Fluorescence Intensity				Fluorescence Intensity				Fluorescence Intensity				Fluorescence Intensity				Fluorescence Intensity
	Distance (um)	ER tubule	Inclusion		Distance (um)	ER tubule	Inclusion		Distance (um)	ER tubule	Inclusion		Distance (um)	ER tubule	Inclusion		Distance (um)	ER tubule	Inclusion
	0	11777	10364		0	11614	10351		0	12042	10386		0	13103	10756		0	12254	10638
	0.05412	11940.1	10388.4		0.05412	11789.5	10429.1		0.05412	12286	10495		0.05412	13460.5	10860.5		0.05412	12684.1	10816.2
	0.10823	12161.4	10420.6		0.10823	12018.5	10511.5		0.10823	12592.1	10637.8		0.10823	13704.9	11002.7		0.10823	13234.9	11026.4
	0.16235	12548.2	10459.7		0.16235	12255.6	10590.5		0.16235	12867.5	10811		0.16235	13793.4	11188.7		0.16235	13679.5	11236.5
	0.21646	12940.8	10486.9		0.21646	12570.5	10643.2		0.21646	13078.7	11001.8		0.21646	13777.8	11301.5		0.21646	13818.6	11347.4
	0.27058	13502.5	10520.4		0.27058	12932	10701.8		0.27058	13261.3	11180.6		0.27058	13727.4	11366		0.27058	13691.3	11387.2
	0.32469	13855.6	10572		0.32469	13331.5	10781.8		0.32469	13356.6	11211.6		0.32469	13722.1	11358		0.32469	13484.1	11403.6
	0.37881	14138.4	10633.6		0.37881	13731.2	10865.5		0.37881	13463.7	11185		0.37881	13677.8	11374.1		0.37881	13305.8	11407.5
	0.43292	14445.7	10686.2		0.43292	14107.3	10936.5		0.43292	13598.3	11089.4		0.43292	13630.4	11397.2		0.43292	13176.8	11409.2
	0.48704	14585	10732.8		0.48704	14355.8	10975.4		0.48704	13657	10944		0.48704	13610.5	11374.5		0.48704	13128.7	11406.9
	0.54115	14576.7	10760.8		0.54115	14429.2	11007.7		0.54115	13708.1	10849.9		0.54115	13573.9	11332.2		0.54115	13079.7	11383.8
	0.59527	14443.2	10760.1		0.59527	14444.5	11019.1		0.59527	13722.4	10843.1		0.59527	13384.1	11180.2		0.59527	13067.4	11339.3
	0.64939	14099.2	10738.5		0.64939	14313.2	11013.8		0.64939	13671.6	10839		0.64939	13136.1	11041.5		0.64939	12954.6	11233
	0.7035	13646.8	10697.4		0.7035	14068.8	10959.6		0.7035	13553.9	10834.6		0.7035	12787.5	10986.4		0.7035	12670.6	11114.9
	0.75762	13116.8	10622.5		0.75762	13738.9	10871		0.75762	13307.8	10801.9		0.75762	12517.9	10965.6		0.75762	12237.5	10984.5
	0.81173	12714.7	10543		0.81173	13313.6	10791.7		0.81173	12936.7	10697		0.81173	12264.9	11006.8		0.81173	11723.9	10911.1
	0.86585	12389.1	10477.3		0.86585	12862.7	10738.9		0.86585	12490.1	10574.7		0.86585	11986.5	11116.5		0.86585	11231.4	10859.9
	0.91996	12044.5	10415.9		0.91996	12395.1	10682.5		0.91996	12145.5	10495.1		0.91996	11627.3	11246.5		0.91996	10884.8	10810.7
	0.97408	11643.7	10349.9		0.97408	11929.8	10603.6		0.97408	11898.9	10439.5		0.97408	11240.6	11341.4		0.97408	10656.9	10755.2
	1.02819	11201.6	10310.3		1.02819	11473.5	10522.5		1.02819	11652.6	10432.7		1.02819	10929	11297.9		1.02819	10561.4	10696
	1.08231	10825	10294.6		1.08231	11060.5	10472		1.08231	11406.4	10429.1		1.08231	10734.7	11178.5		1.08231	10518.2	10630.6
	1.13642	10603	10301.5		1.13642	10768.8	10419.8		1.13642	11074.4	10403.3		1.13642	10657.7	10956.7		1.13642	10474.1	10533.8
	1.19054	10488.2	10319.9		1.19054	10586.1	10387.4		1.19054	10783.9	10355.3		1.19054	10627.3	10730.8		1.19054	10434.1	10429.3
	1.24466	10436	10337.4		1.24466	10494.3	10371.2		1.24466	10600	10295.3		1.24466	10617.4	10598.6		1.24466	10414.8	10321.7
	1.29877	10434.2	10363.8		1.29877	10443.6	10383.6		1.29877	10585.9	10305.6		1.29877	10622.5	10561.9		1.29877	10425.6	10266.1
	1.35289	10463.1	10393.3		1.35289	10416.1	10434.1		1.35289	10618.9	10326.2		1.35289	10639.4	10543.9		1.35289	10460.5	10235.5
	1.407	10511.5	10401.8		1.407	10412.4	10516.3		1.407	10685.9	10441.8		1.407	10653.8	10504.7		1.407	10500.7	10214.1
	1.46112	10570.7	10406.9		1.46112	10423.3	10586.8		1.46112	10690.1	10634.8		1.46112	10673.5	10451.7		1.46112	10554.7	10199.7
	1.51523	10613.2	10409		1.51523	10441.4	10638.8		1.51523	10699.2	10816.6		1.51523	10710.1	10390.6		1.51523	10608	10198
	1.56935	10621.7	10413.7		1.56935	10446	10671.6		1.56935	10670.6	10940.4		1.56935	10778	10381.8		1.56935	10643.6	10202.2
	1.62346	10624.4	10493.2		1.62346	10450.9	10687.7		1.62346	10672.5	10988.7		1.62346	10830.6	10423.4		1.62346	10650.5	10229
	1.67758	10606.4	10612.6		1.67758	10434.7	10678.5		1.67758	10681.5	10966.1		1.67758	10874.9	10495.8		1.67758	10686.5	10253.9
	1.73169	10607.1	10736.7		1.73169	10418.7	10661.8		1.73169	10736.8	10844.5		1.73169	10910.5	10564.5		1.73169	10780.4	10270.7
	1.78581	10634.6	10782.8		1.78581	10423	10627		1.78581	10816.4	10738.9		1.78581	10942	10588.7		1.78581	10862.7	10293.9
	1.83992	10699.7	10768		1.83992	10487.9	10604.9		1.83992	10906.1	10683.7		1.83992	10970.3	10600.5		1.83992	10881	10329.9
	1.89404	10767.7	10748.5		1.89404	10553.6	10613.8		1.89404	10941.6	10690.6		1.89404	10977.7	10615.5		1.89404	10869.5	10372.1
	1.94816	10778.6	10738.5		1.94816	10562.8	10713.1		1.94816	10917.8	10782.7		1.94816	10960.4	10653.4		1.94816	10819	10409
	2.00227	10744.9	10687.3		2.00227	10561	10832.8		2.00227	10831.1	11016		2.00227	10867.2	10710.8		2.00227	10757	10448.7
	2.05639	10667.5	10641.5		2.05639	10533.8	10912		2.05639	10717.8	11328.5		2.05639	10726.5	10768.3		2.05639	10722.5	10504.3
	2.1105	10604.1	10573.9		2.1105	10494.3	10910.2		2.1105	10597.9	11585.9		2.1105	10581.5	10791.1		2.1105	10686.1	10572.4
	2.16462	10590.2	10496.1		2.16462	10485.8	10857.4		2.16462	10500.5	11644.5		2.16462	10477.1	10793		2.16462	10602.5	10653.8
	2.21873	10591.9	10422.5		2.21873	10478.6	10804.4		2.21873	10406	11620.1		2.21873	10401.8	10817.7		2.21873	10497.3	10734.9
	2.27285	10607.5	10380.5		2.27285	10465.7	10708		2.27285	10317.8	11386.3		2.27285	10365	10871		2.27285	10399	10791.7
	2.32696	10634.1	10359.6		2.32696	10447.1	10641.2		2.32696	10285.6	11215.2		2.32696	10351.1	10979.4		2.32696	10331.2	10849.9
	2.38108	10636.7	10351.8		2.38108	10444.7	10582.8		2.38108	10287.5	11125.9		2.38108	10357.1	11113.2		2.38108	10298.9	10860.8
	2.43519	10644.3	10327.3		2.43519	10449	10545.6		2.43519	10310.5	11153.2		2.43519	10358.8	11123.1		2.43519	10312.3	10861
	2.48931	10570	10309.7		2.48931	10449.2	10477.7		2.48931	10367.6	11257.5		2.48931	10374.3	11130.6		2.48931	10319	10776.7
	2.54343	10439.7	10302.5		2.54343	10421.5	10406.5		2.54343	10400.6	11327.7		2.54343	10379.1	11030.1		2.54343	10315.1	10643.7
	2.59754	10321.8	10298.4		2.59754	10326.5	10333.6		2.59754	10399.3	11313.2		2.59754	10356.1	10902.6		2.59754	10299.9	10502.6
	2.65166	10238	10293		2.65166	10229	10292		2.65166	10380	11298		2.65166	10304	10800		2.65166	10275	10393

## Sheet: Fig 2F, 2G
	SMVs							Mock	4h	8h	12h	16h
	Mock	4h	8h	12h	16h		Number of values	5	5	5	5	5
	125	3	112	152	113
	76	5	159	66	75		Minimum	8	21	110.5	70	45.5
	18	13	107	123	16		25% Percentile	11	22	115.5	89.25	63.25
	14	18	107	45	87		Median	18	24	123	167.5	120.5
	8	9	86	252	56		75% Percentile	100.5	29.25	157.3	237.5	165
		39	109	371	49		Maximum	125	32.5	160.5	261.5	170.5
		47	149	74	16
		52	139	304	225		Mean	48.2	25.3	133.7	164.2	115.4
		28	134	172	254		Std. Deviation	50.91	4.41	22.12	77.27	52.62
		39	235	83	263		Std. Error of Mean	22.77	1.972	9.893	34.56	23.53
							Lower 95% CI of median	8	21	110.5	70	45.5
							Upper 95% CI of median	125	32.5	160.5	261.5	170.5
							Sum	241	126.5	668.5	821	577
	DMVs							Mock	4h	8h	12h	16h
	Mock	4h	8h	12h	16h		Number of values	5	5	5	5	5
	0	0	0	8	2
	0	0	1	16	1		Minimum	0	0	0	1.5	1.5
	0	1	0	2	1		25% Percentile	0	0	0	3.25	1.5
	0	0	0	3	3		Median	0	0	0.5	5	6.5
	0	1	1	0	10		75% Percentile	0	0.5	0.5	7	8.5
		0	1	4	17		Maximum	0	0.5	0.5	8	9.5
		0	0	0	2
		0	0	8	12		Mean	0	0.2	0.3	5.1	5.3
		0	0	7	0		Std. Deviation	0	0.2739	0.2739	2.356	3.633
		0	0	3	5		Std. Error of Mean	0	0.1225	0.1225	1.054	1.625
							Lower 95% CI of median	0	0	0	1.5	1.5
							Upper 95% CI of median	0	0.5	0.5	8	9.5
							Sum	0	1	1.5	25.5	26.5

## Sheet: Fig 3A, 3B, 3C
	PFU / mL								siNT	siULK1	siULK2	siATG2A	siATG9A	siTBC1D14
	siNT	siULK1	siULK2	siATG2A	siATG9A	siTBC1D14		Number of values	7	3	3	3	6	3
	2500000	1500000	60000	1500000	530000	1670000
	2000000	1300000	70000	1500000	600000	1300000		Minimum	1100000	1300000	60000	1500000	190000	1300000
	2100000	2000000	73000	1700000	670000	1300000		25% Percentile	1100000	1300000	60000	1500000	190000	1300000
	1800000							Median	1800000	1500000	70000	1500000	400000	1300000
	1100000				190000			75% Percentile	2100000	2000000	73000	1700000	617500	1670000
	1100000				190000			Maximum	2500000	2000000	73000	1700000	670000	1670000
	1200000				270000
								Mean	1686000	1600000	67667	1567000	408333	1423000
								Std. Deviation	558058	360555	6807	115470	216556	213620
								Std. Error of Mean	210926	208167	3930	66667	88409	123333
								Lower 95% CI of mean	1170000	704335	50758	1280000	181071	892675
								Upper 95% CI of mean	2202000	2496000	84576	1854000	635596	1954000
								Sum	11800000	4800000	203000	4700000	2450000	4270000
	RT-qPCR
		siNT							siNT	siULK1				siNT	siULK2				siNT	siTBC1D14
		1	0.249	siULK1				Number of values	3	3			Number of values	3	3			Number of values	3	3
		1	0.312
		1	0.182					Minimum	1	0.182			Minimum	1	0.4678			Minimum	1	0.223
		1	0.467752	siULK2				25% Percentile	1	0.182			25% Percentile	1	0.4678			25% Percentile	1	0.223
		1	0.565866					Median	1	0.249			Median	1	0.5444			Median	1	0.262
		1	0.544389					75% Percentile	1	0.312			75% Percentile	1	0.5659			75% Percentile	1	0.273
		1	0.262	siTBC1D14				Maximum	1	0.312			Maximum	1	0.5659			Maximum	1	0.273
		1	0.223
		1	0.273					Mean	1	0.2477			Mean	1	0.526			Mean	1	0.2527
								Std. Deviation	0	0.06501			Std. Deviation	0	0.05158			Std. Deviation	0	0.02627
								Std. Error of Mean	0	0.03753			Std. Error of Mean	0	0.02978			Std. Error of Mean	0	0.01517
								Lower 95% CI of mean	1	0.08617			Lower 95% CI of mean	1	0.3979			Lower 95% CI of mean	1	0.1874
								Upper 95% CI of mean	1	0.4092			Upper 95% CI of mean	1	0.6541			Upper 95% CI of mean	1	0.3179
								Sum	3	0.743			Sum	3	1.578			Sum	3	0.758
	Band Densitometry								siNT	siATG9A				siNT	siATG2A
	siNT	siATG9A		siNT	siATG2A			Number of values	6	6			Number of values	3	3
	1	0.08571		1	0.063
	1	0.154564		1	0.109			Minimum	1	0.08571			Minimum	1	0.063
	1	0.103705		1	0.078			25% Percentile	1	0.09921			25% Percentile	1	0.063
	1	0.280648						Median	1	0.2154			Median	1	0.078
	1	0.281746						75% Percentile	1	0.2809			75% Percentile	1	0.109
	1	0.276277						Maximum	1	0.2817			Maximum	1	0.109
								Mean	1	0.1971			Mean	1	0.08333
								Std. Deviation	0	0.09312			Std. Deviation	0	0.02346
								Std. Error of Mean	0	0.03801			Std. Error of Mean	0	0.01354
								Lower 95% CI of mean	1	0.09939			Lower 95% CI of mean	1	0.02506
								Upper 95% CI of mean	1	0.2948			Upper 95% CI of mean	1	0.1416
								Sum	6	1.183			Sum	3	0.25

## Sheet: Fig 3F
	siNT			siATG9A					Circularity					Roundness
	Roundness	Circularity		Roundness	Circularity				siNT	siATG9A				siNT	siATG9A
	0.648714	0.560899		0.530963	0.468414			Number of values	104	84			Number of values	104	84
	0.607423	0.547481		0.562265	0.560183
	0.633986	0.636656		0.595438	0.592963			Minimum	0.3853	0.3606			Minimum	0.599	0.531
	0.646914	0.574108		0.581798	0.56379			25% Percentile	0.5581	0.4721			25% Percentile	0.6372	0.5753
	0.667059	0.706054		0.616073	0.624829			Median	0.6263	0.5336			Median	0.651	0.5926
	0.647554	0.648345		0.573846	0.538225			75% Percentile	0.6801	0.5799			75% Percentile	0.6681	0.6035
	0.640403	0.622895		0.61457	0.563956			Maximum	0.802	0.6963			Maximum	0.726	0.632
	0.641879	0.692458		0.609753	0.65047
	0.689048	0.739136		0.593098	0.586573			Mean	0.6121	0.5265			Mean	0.6548	0.5902
	0.630406	0.624387		0.587066	0.558879			Std. Deviation	0.09664	0.0762			Std. Deviation	0.02577	0.01985
	0.679415	0.765576		0.618162	0.564614			Std. Error of Mean	0.009476	0.008314			Std. Error of Mean	0.002527	0.002166
	0.636904	0.662332		0.593636	0.588221
	0.677296	0.628118		0.609087	0.599141			Lower 95% CI of mean	0.5933	0.51			Lower 95% CI of mean	0.6498	0.5859
	0.629199	0.66272		0.621657	0.519848			Upper 95% CI of mean	0.6309	0.543			Upper 95% CI of mean	0.6598	0.5945
	0.715182	0.699713		0.624998	0.564528
	0.666805	0.553949		0.585383	0.551878			Sum	63.66	44.23			Sum	68.1	49.58
	0.658803	0.557155		0.58489	0.436554
	0.656049	0.545858		0.599197	0.453683
	0.682541	0.580337		0.626367	0.63385
	0.668659	0.550854		0.574966	0.530528
	0.646447	0.49998		0.626055	0.642497
	0.664969	0.61719		0.608802	0.628854
	0.618021	0.469719		0.590716	0.436789
	0.604366	0.442314		0.606728	0.580934
	0.62291	0.490479		0.570595	0.55897
	0.647826	0.569273		0.567514	0.532393
	0.61657	0.46386		0.576471	0.416171
	0.651359	0.487734		0.586588	0.536473
	0.642279	0.699583		0.597507	0.490444
	0.68767	0.729557		0.610008	0.548437
	0.646842	0.658526		0.575336	0.529822
	0.671413	0.735442		0.567769	0.550553
	0.709641	0.784239		0.616484	0.534234
	0.631523	0.670811		0.598131	0.524138
	0.649696	0.726013		0.604474	0.514
	0.66155	0.714495		0.570946	0.502146
	0.690669	0.7088		0.602119	0.495097
	0.637204	0.477078		0.580418	0.46013
	0.659653	0.552393		0.562657	0.443833
	0.66384	0.574294		0.605571	0.500129
	0.64657	0.691218		0.606442	0.41314
	0.637825	0.661205		0.585363	0.47006
	0.637218	0.600984		0.547566	0.386971
	0.613897	0.632341		0.575256	0.360576
	0.648092	0.604634		0.567328	0.365872
	0.665504	0.633348		0.572279	0.380757
	0.705044	0.637119		0.55232	0.443696
	0.726025	0.704106		0.570784	0.380336
	0.656412	0.5881		0.577739	0.508513
	0.675907	0.60702		0.591178	0.394994
	0.716201	0.703719		0.555449	0.533338
	0.685248	0.622538		0.600083	0.619824
	0.699963	0.593492		0.591487	0.591789
	0.680491	0.676135		0.601174	0.657415
	0.674222	0.608689		0.632048	0.696251
	0.641533	0.585313		0.602008	0.630137
	0.673136	0.664027		0.596894	0.645806
	0.647799	0.617194		0.6159	0.551501
	0.625222	0.432859		0.611226	0.586997
	0.621045	0.399		0.580393	0.576667
	0.648277	0.414818		0.595381	0.584956
	0.658674	0.385255		0.598425	0.655754
	0.637845	0.418476		0.595987	0.394959
	0.635672	0.430779		0.54818	0.533859
	0.621559	0.388493		0.593883	0.438704
	0.661682	0.431425		0.574435	0.391069
	0.599034	0.39133		0.594839	0.478405
	0.627831	0.545422		0.567094	0.461987
	0.635442	0.49889		0.597036	0.503494
	0.622321	0.638924		0.590549	0.550134
	0.657285	0.644756		0.575078	0.516835
	0.662881	0.688699		0.585374	0.516014
	0.650157	0.684885		0.603814	0.509249
	0.635523	0.585468		0.592193	0.520923
	0.652037	0.66303		0.586854	0.574271
	0.64582	0.707587		0.558991	0.464818
	0.644422	0.696859		0.578039	0.535071
	0.630704	0.658954		0.602474	0.522528
	0.627695	0.643264		0.589562	0.491725
	0.651323	0.667937		0.608254	0.586938
	0.652856	0.654284		0.588067	0.508613
	0.61318	0.632371		0.596354	0.535725
	0.658253	0.587569		0.597703	0.608628
	0.631469	0.61348		0.595575	0.570479
	0.642736	0.67074
	0.657991	0.622434
	0.659721	0.609616
	0.694888	0.802004
	0.657783	0.770284
	0.679159	0.739417
	0.711312	0.799353
	0.650578	0.562259
	0.647037	0.662145
	0.67062	0.693515
	0.667266	0.656281
	0.668252	0.64329
	0.64608	0.611895
	0.688151	0.681448
	0.664217	0.576296
	0.667527	0.643126
	0.66542	0.609465
	0.701125	0.688748
	0.640161	0.548977
	0.633705	0.500381

## Sheet: Fig 3H, 3I
	Band Densitometry						Band Densitometry
	LC3-I						LC3-II
	siNT M	siATG9A M	siNT PR8	siATG9A PR8			siNT M	siATG9A M	siNT PR8	siATG9A PR8
	1	3.01	1.33	0.01			1	1.37	1.45	1.92
	1	1.71	0.07	0.04			1	1.42	0.6	0.34
	1	1.27	0.1	0.01			1	0.51	0.2	0.93
	1	1.05	0.23	0			1	3.92	2.1	3.89
	1	0.44	0.51	2.42			1	0.89	1.55	3.29
	1	0.82	0.33	0.23			1	0.79	1.07	0.94
	siNT M	siATG9A M	siNT PR8	siATG9A PR8				siNT M	siATG9A M	siNT PR8	siATG9A PR8
Number of values	6	6	6	6			Number of values	6	6	6	6
Minimum	1	0.44	0.07	0			Minimum	1	0.51	0.2	0.34
25% Percentile	1	0.725	0.0925	0.0075			25% Percentile	1	0.72	0.5	0.7825
Median	1	1.16	0.28	0.025			Median	1	1.13	1.26	1.43
75% Percentile	1	2.035	0.715	0.7775			75% Percentile	1	2.045	1.688	3.44
Maximum	1	3.01	1.33	2.42			Maximum	1	3.92	2.1	3.89
Mean	1	1.383	0.4283	0.4517			Mean	1	1.483	1.162	1.885
Std. Deviation	0	0.9038	0.4701	0.9682			Std. Deviation	0	1.244	0.6875	1.427
Std. Error of Mean	0	0.369	0.1919	0.3953			Std. Error of Mean	0	0.5078	0.2807	0.5827
Lower 95% CI of mean	1	0.4349	-0.06499	-0.5644			Lower 95% CI of mean	1	0.1781	0.4402	0.387
Upper 95% CI of mean	1	2.332	0.9217	1.468			Upper 95% CI of mean	1	2.789	1.883	3.383
Sum	6	8.3	2.57	2.71			Sum	6	8.9	6.97	11.31

## Sheet: Fig 4B
	Pearson R value								Pearson R value
	M (14h)	4h	6h	8h	14h				M (14h)	4h	6h	8h	14h
	0.2096	0.4463	0.4639	0.2271	0.1721			Number of values	36	33	29	31	25
	0.515	0.5048	0.4568	0.2671	0.1821
	0.4773	0.3637	0.3345	0.3295	0.1904			Minimum	0.2096	0.2078	0.1071	0.1017	0.1066
	0.3294	0.3084	0.3233	0.3473	0.2518			25% Percentile	0.3309	0.3475	0.2685	0.2288	0.1863
	0.4444	0.5084	0.2453	0.4157	0.2295			Median	0.4043	0.4074	0.3241	0.2736	0.243
	0.5181	0.3283	0.3241	0.329	0.218			75% Percentile	0.4786	0.4788	0.3743	0.329	0.2949
	0.4448	0.3472	0.3468	0.4923	0.3134			Maximum	0.5784	0.5108	0.4663	0.4923	0.4158
	0.5095	0.4086	0.1807	0.3406	0.1066
	0.3076	0.2678	0.3144	0.1774	0.4158			Mean	0.4114	0.3997	0.3184	0.2808	0.2422
	0.3438	0.3394	0.3755	0.4	0.1517			Std. Deviation	0.09068	0.08704	0.09801	0.07606	0.07345
	0.4733	0.2088	0.3341	0.2736	0.3071			Std. Error of Mean	0.01511	0.01515	0.0182	0.01366	0.01469
	0.3261	0.2078	0.4125	0.2423	0.2707
	0.3716	0.3566	0.3643	0.2126	0.2103			Lower 95% CI of mean	0.3807	0.3689	0.2811	0.2529	0.2119
	0.4589	0.3491	0.2544	0.2631	0.266			Upper 95% CI of mean	0.4421	0.4306	0.3556	0.3087	0.2725
	0.3681	0.3888	0.1117	0.2474	0.3478
	0.4692	0.4664	0.4663	0.258	0.3115			Sum	14.81	13.19	9.233	8.706	6.055
	0.479	0.4226	0.2785	0.2288	0.26
	0.4854	0.386	0.2698	0.3244	0.2019
	0.3683	0.4721	0.1071	0.205	0.3387
	0.5081	0.48	0.3241	0.2638	0.2398
	0.29	0.5005	0.3019	0.213	0.2518
	0.553	0.4052	0.2671	0.2965	0.2826
	0.3994	0.5108	0.1327	0.3165	0.1757
	0.3352	0.4775	0.373	0.3472	0.117
	0.2412	0.4876	0.4112	0.2803	0.243
	0.325	0.4518	0.3355	0.2523
	0.3257	0.4895	0.4596	0.2841
	0.4321	0.3759	0.3017	0.2743
	0.3983	0.3477	0.3618	0.1951
	0.3283	0.5079		0.1017
	0.5615	0.4164		0.2995
	0.5784	0.4074
	0.4521	0.2523
	0.3883
	0.3851
	0.4091

## Sheet: Fig 4C
	Band desitometry										Band desitometry
		Average ATG9A / Actin										ATG9A / Actin Normalized to M(4h)
		M	4h	M	6h	M	8h	M	14h			M (4h)	4h	M	6h	M	8h	M	14h
		0.55825	0.29593	0.299264	0.897153	0.55799	0.470482	0.644139	0.461677			1	0.530102	0.536075	1.60708	0.999534	0.842779	1.15385	0.827007
		1.75074	0.49708	1.75074	2.02758	1.25736	1.51727	1.25736	3.36294			1	0.283926	1	1.15813	0.718188	0.866643	0.718188	1.92087
		0.318865	0.595335	0.170935	0.442475	0.443778	0.310085	0.512294	0.137284			1	1.86704	0.536075	1.38766	1.39174	0.972463	1.60662	0.430538
	Original blots can be found in Supporting Information file "S1 Raw Images"

## Sheet: Fig 5A, 5B
	PFU / mL
	GFP-Rab11a WT		GFP-Rab11a DN									Normalized to siNT
	siNT	siATG9A	siNT	siATG9A			Rab11a WT		Rab11a DN			Rab11a WT		Rab11a DN
	450000	200000	1200	130			siNT	siATG9A	siNT	siATG9A		siNT	siATG9A	siNT	siATG9A
	550000	150000	1000	230			5.94595	0.424038	3.71534	0.969096		1	0.0713155	1	0.260837
	550000	130000	670	130			0.16303	0.0143422	0.398192	0.00195338		1	0.0879731	1	0.00490561
	1200000	220000	1900	430			0.276451	0.043331	0.206903	0.057631		1	0.15674	1	0.278541
	1400000	230000	2000	670
	1300000	240000	2900	330
								siNT WT	siATG9A WT	siNT DN	siATG9A DN
							Number of values	3	3	3	3
		GFP-Rab11a WT		GFP-Rab11a DN
		siNT	siATG9A	siNT	siATG9A		Minimum	1	0.07	1	0
	Number of values	6	6	6	6		25% Percentile	1	0.07	1	0
							Median	1	0.09	1	0.26
	Minimum	450000	130000	670	130		75% Percentile	1	0.16	1	0.28
	25% Percentile	525000	145000	917.5	130		Maximum	1	0.16	1	0.28
	Median	875000	210000	1550	280
	75% Percentile	1325000	232500	2225	490		Mean	1	0.1067	1	0.18
	Maximum	1400000	240000	2900	670		Std. Deviation	0	0.04726	0	0.1562
							Std. Error of Mean	0	0.02728	0	0.09019
	Mean	908333	195000	1612	320
	Std. Deviation	435220	45056	815.4	207.4		Lower 95% CI of mean	1	-0.01073	1	-0.208
	Std. Error of Mean	177678	18394	332.9	84.66		Upper 95% CI of mean	1	0.2241	1	0.568
	Lower 95% CI of mean	451597	147717	756	102.4		Sum	3	0.32	3	0.54
	Upper 95% CI of mean	1365000	242283	2467	537.6
	Sum	5450000	1170000	9670	1920

## Sheet: Fig 5E
	Pearson R value
Rab11a / NP	siNT	siATG9A			siNT	siATG9A
	0.708	0.3542		Number of values	22	21
	0.5348	0.4303
	0.5897	0.5333		Minimum	0.326	0.2761
	0.4621	0.7115		25% Percentile	0.5357	0.5416
	0.607	0.706		Median	0.6094	0.6235
	0.6117	0.7044		75% Percentile	0.6504	0.7052
	0.5327	0.5837		Maximum	0.708	0.7849
	0.6483	0.5498
	0.6566	0.2761		Mean	0.5855	0.6015
	0.6458	0.7849		Std. Deviation	0.09453	0.1313
	0.5512	0.6319		Std. Error of Mean	0.02015	0.02866
	0.4036	0.6769
	0.5858	0.6551		Lower 95% CI of mean	0.5436	0.5417
	0.6167	0.7171		Upper 95% CI of mean	0.6274	0.6613
	0.536	0.5661
	0.5535	0.6024		Sum	12.88	12.63
	0.326	0.6235
	0.6282	0.5984
	0.6772	0.7491
	0.6621	0.7043
	0.6482	0.4723
	0.6958

[truncated: 13 more sheets: Fig 5F, Fig 6A-D, 6H, Fig 6I, Fig 7A, Fig 7B, Fig 7C, Fig 7D, 7E, Fig S1, S3 Fig, S4A, S4B Fig, S4C, S4D Fig, S7F Fig, Oligonucleotides]
